## 1 **The ELEMI healthcare professional Study**

2  
3 <sup>1,4</sup>Gayathri Delanerolle, <sup>2</sup>Yunshan Li\*, <sup>4</sup>Heitor Cavalini\*,<sup>4</sup>Katharine Barnard-Kelly,  
4 <sup>4</sup>Katheryn Elliot, <sup>5</sup>Vanessa Raymont, <sup>10</sup>Nicola Pluchino, <sup>11</sup>Idaliz Flores, <sup>5</sup>Sohier Elneil,  
5 <sup>12</sup>Kingshuk Majumder, <sup>14</sup>Amy Boyd Welsh, <sup>13</sup>Martin Sillem, M. Louise Hull,<sup>8</sup> Rebecca  
6 O'Hara<sup>8</sup>, <sup>4</sup>Shanaya Rathod, <sup>6</sup>Ashish Shetty, <sup>2,8</sup>Jian Qing Shi\*\*, <sup>7</sup>Dharani K  
7 Hapangama\*\*, <sup>3,4</sup>Peter Phiri\*\*

### 8 9 **Affiliations**

10  
11 <sup>1</sup>Nuffield Department of Primary Health Care, University of Oxford, OX3 7JX, Oxford,  
12 UK  
13 <sup>2</sup>Southern University of Science and Technology, Shenzhen, 518055, China  
14 <sup>3</sup>Psychology Department, Faculty of Environmental and Life Sciences, University of  
15 Southampton, SO17 1BJ, Southampton, UK  
16 <sup>4</sup>Research & Innovation Department, Southern Health NHS Foundation Trust, SO40  
17 2RZ, UK  
18 <sup>5</sup>Department of Psychiatry, University of Oxford, OX3 7JX, Oxford, UK  
19 <sup>6</sup>University College London, London, UK  
20 <sup>7</sup>University of Liverpool, UK  
21 <sup>8</sup>Robinson Research Institute, University of Adelaide, Australia, 5006  
22 <sup>9</sup>National Center for Applied Mathematics Shenzhen, China  
23 <sup>10</sup>Lausanne University Hospital, Lausanne, Switzerland  
24 <sup>11</sup>School of Medicine and Ponce Research Institute, Ponce Health Science University  
25 <sup>12</sup>Manchester University Hospitals NHS Foundation Trust  
26 <sup>13</sup>University Hospital Homburg, Germany  
27 <sup>14</sup>Nuffield Department of Medicine, University of Oxford, OX3 7JX, Oxford, UK  
28  
29  
30  
31  
32

### 33 **Corresponding author: Peter Phiri**

#### 34 **Director of Research & Innovation/ Visiting Fellow,**

35 Research & Innovation Department, Southern Health NHS Foundation Trust, Clinical  
36 Trials Facility, Tom Rudd Unit Moorgreen Hospital,  
37 Botley Road, West End, Southampton SO30 3JB,  
38 United Kingdom  
39 **peter.phiri@southernhealth.nhs.uk**

40  
41  
42 \*\* Shared last author

43 \* Shared second author  
44

### 45 **Conflicts of interest**

46 PP has received research grant from Novo Nordisk, and other, educational other from  
47 John Wiley & Sons, other from Janssen Cilag, outside the submitted work. SR reports  
48 other from Janssen, Lundbeck and Otsuka outside the submitted work. All other authors  
49 report no conflict of interest. The views expressed are those of the authors and not  
50 necessarily those of the NHS, the National Institute for Health Research, the  
51 Department of Health and Social Care or the Academic institutions.  
52  
53

### 54 **Availability of data and material**

55 The authors will consider sharing the dataset gathered upon receipt of reasonable  
56 requests.  
57

### 58 **Code availability**

59 The authors will consider sharing the dataset gathered upon receipt of reasonable  
60 requests.  
61

62 **Author contributions**

63 GD, AS and PP developed the study protocol and embedded this within the ELEMI  
64 project's work-package 2. GD, YL and JQS designed and completed the statistical  
65 analysis. All authors critically appraised and commented on previous versions of the  
66 manuscript. All authors read and approved the final manuscript.

67

68

69 **Ethics approval**

70 HRA REC approval 21/HRA/3500 was obtained prior to the study initiation.

71

72 **Consent to participate**

73 All participants consented to take part in this study.

74

75 **Consent for publication**

76 All authors consented to publish this manuscript.

77

78 **Acknowledgements**

79 The authors acknowledge support from Southern Health NHS Foundation Trust.

80

81 Words: TBC

82

83

84

85

86

87

88 **Abstract**

89 **Introduction**

90 Endometriosis impacts 1 in 10 women and can be a debilitating disease. Late diagnosis  
91 is a major challenge with Endometriosis, contributing further to the exacerbation of  
92 symptoms and suboptimal clinical management. Regardless of the commonality of the  
93 condition, public awareness and research around endometriosis is severely lacking.

94

95

96 **Methods**

97 To explore the knowledge base about Endometriosis we developed a digital cross-  
98 sectional study. We used the Qualtrics XM platform and developed a questionnaire.  
99 The primary objective of the study was to report the understanding of Endometriosis  
100 among healthcare professionals in a mental healthcare setting in the UK.

101

102 **Results:**

103 We gathered the responses of 144 healthcare professionals, although only 68  
104 participants responded to all questions. Approximately 96% of participants agreed that  
105 there is a need for a comprehensive clinical strategy where mental health care services  
106 could assist women very early in the pathway. Around 63.1% confirmed awareness of  
107 endometriosis although the  $\chi^2$  (p-value=0.158) test showed that the perceived clinical  
108 knowledge was not necessarily associated with their profession. Over 92% of  
109 participants confirmed that it would be useful to conduct mental health-based research  
110 among endometriosis patients.

111

112 **Discussion:** It is clear than patients with endometriosis would greatly benefit from a  
113 streamlined clinical pathway. It would also have financial benefits to the NHS, including  
114 less visits to A&E. The absence of comprehensive knowledge and understanding  
115 amongst healthcare professional on endometriosis leads to delayed diagnosis and  
116 treatment, exacerbating their psychological and physiological symptoms.

117

118 **Conclusions:**

119 Our study shows the importance of funding mental health research to further add to the  
120 body of knowledge in order to develop evidence based clinical practices that are equally  
121 acceptable to women with endometriosis. This will have benefits for both the patients,  
122 healthcare professional, and also the NHS. It will enable for better treatment pathways  
123 and symptom management, aiding the development for improved healthcare policies.

124

125

126

## 127 Introduction

128  
129 Endometriosis is a common disease characterised by the presence of endometrial-like  
130 tissue outside the uterus, which leads to adhesions and fibrosis as the tissue breaks  
131 down and regenerates in response to cyclical reproductive hormones<sup>1</sup>. Key symptoms  
132 among women with endometriosis include chronic pelvic pain, dysmenorrhoea, period-  
133 related or cyclical urinary and gastrointestinal symptoms, and dyspareunia. Many  
134 women report depression and anxiety, in addition to a variety of mental health  
135 disturbances that may require clinical management<sup>1</sup>. Women with endometriosis are  
136 also at high risk of developing other health problems and have an increased life-time  
137 risk of health multimorbidity and polypharmacy to manage this condition long-term<sup>2</sup>.

138  
139 An estimated 1.5 million women are likely to have endometriosis in the United Kingdom  
140 (UK), which is similar to the estimates for asthma or diabetes<sup>3</sup>. Endometriosis UK  
141 reported 62% of women between the ages of 16 and 24 years in the UK lack awareness  
142 of endometriosis, whilst 74% of men do not know about the disease<sup>4</sup>. The National  
143 Health Service (NHS) in the UK provides specialist endometriosis centres in a variety of  
144 geographical areas, although these are not always universally accessible to patients. As  
145 the NHS has primary, secondary and tertiary care settings, a comprehensive data-  
146 linkage healthcare record may not be available to streamline the complex clinical  
147 management required for endometriosis care<sup>5</sup>. The initial access point for all  
148 endometriosis patients is primary care, where General Practitioners (GPs) provide a  
149 provisional clinical diagnosis and treatment plan prior to the initiation of any acute or  
150 chronic assessments conducted within secondary and tertiary care settings<sup>5</sup>.

151  
152 Endometriosis patients in the UK frequently access Accident and Emergency (A&E)  
153 services to help with emergent symptoms of disease<sup>4</sup>. Endometriosis diagnosis might  
154 be difficult since there is no definite diagnostic test and symptoms vary greatly across  
155 people. Laparoscopy, which includes inserting a camera via a tiny incision in the  
156 abdomen to see the pelvic organs and any apparent endometriotic lesions, is the gold  
157 standard for diagnosis<sup>6</sup>. This technique, however, is invasive and not often easily  
158 accessible to patients.

159  
160 Endometriosis treatment choices are determined by the severity of symptoms, the  
161 extent of the illness, and the patient's age and reproductive objectives. Nonsteroidal  
162 anti-inflammatory medicines (NSAIDs) are used to treat pain, as are hormonal  
163 treatments such as combination oral contraceptives, progestins, gonadotropin-releasing  
164 hormone (GnRH) agonists, and danazol<sup>1,7</sup>. In situations when medicinal treatment is  
165 inadequate, surgical intervention may be required, which may include the removal of  
166 endometriotic lesions and adhesions, as well as hysterectomy and bilateral salpingo-  
167 oophorectomy<sup>1,8</sup>.

168  
169 Despite the fact that endometriosis is common and has a substantial effect on women's  
170 health, there is a dearth of public awareness and research funding for this ailment. To  
171 enhance early identification, diagnosis, and treatment of endometriosis, there is a need  
172 for improved education and awareness among the general public, healthcare  
173 practitioners, and legislators. Additionally, further studies are required to better  
174 understand the disease's underlying causes, create more effective therapies, and  
175 eventually improve the life experience for women with endometriosis.

## 176 177 178 Methods

179 We conducted a cross-sectional survey to explore the understanding of Endometriosis  
180 among health providers. Our primary aim was to evaluate and report the understanding  
181 of Endometriosis among mental healthcare staff in the UK.

182

### 183 *Recruitment*

184 All healthcare providers are eligible to take part in this study through the online survey.  
185 Participants will be invited to participate in the study via multiple media sources  
186 including intranet, email invites and social media, newsletters and communication  
187 campaigns supported by their organisations, deployed online via the NIHR and social  
188 media. All participants will be required to complete the survey at a single time point only

189

### 190 *Inclusion Criteria*

- 191 • ≥18 years
- 192 • Any gender
- 193 • Healthcare staff working directly with women who have endometriosis
- 194 • Healthcare staff working indirectly with women who may have endometriosis  
195 (e.g., women's health services, tertiary care centres such as IAPT)
- 196 • Healthcare staff who have access to a smartphone, tablet or computer to be able  
197 to complete the survey online.

198

### 199 *Survey details*

200 An online Qualtrics XM platform survey will approximately take 10 -15 minutes to  
201 complete following the completion of consent. The survey consists of demographic  
202 details, the Pandemic Stress Index, the Flourishing Scale, and the Compassion Fatigue  
203 Scale.

204

### 205 *Ethical Approval*

206 This study received HRA REC approval 21/HRA/3500 prior to the study initiation.

207

### 208 *Demographical analysis*

209 A demographic analysis was conducted to analyse the questionnaire data, using  
210 descriptive statistics including percentage, mean, median and standard deviation.  
211 Population characteristics of gender, profession, healthcare setting and years of service  
212 among the study participants were also analysed.

213

### 214 *Non-parametric statistical test*

215

216 Non-parametric statistical tests were applied to test whether there was significant  
217 difference between responses based on gender, profession and healthcare setting. Chi-  
218 Square ( $\chi^2$ ) tests were used to assess differences in responses amongst professions  
219 when the answer was nominal. Wilcoxon-Mann-Whitney and Kruskal-Wallis tests were  
220 used (the latter was used for the data with more than two groups). The grouping  
221 variables included gender, profession and health care setting (primary, secondary or  
222 tertiary). Significance was determined by a p value < 0.05. The analysis was undertaken  
223 using the SciPy 1.7.1 package with Python 3.9.7.

224

225 We merged three healthcare professional groups, academic scientists, radiologists and  
226 researchers, together with the original "other" ("other" is a group among several  
227 professions and is derived from the original "academic scientists", "radiologists",  
228 "researchers" and "other".) as one group (still denoted as 'other') since the number  
229 under each of the groups was too small. We then produced a contingency table to  
230 conduct a  $\chi^2$  test to report the difference in opinions between this group and the other  
231 groups.

232 We also ran a post-hoc study to investigate the disparities in endometriosis knowledge  
233 across mental healthcare employees and other healthcare experts. Since the number of

234 participants in each group was limited, we combined three healthcare professional  
235 groups (academic scientists, radiologists, and researchers) with the original "other"  
236 group to form one group (denoted as "other").

237 We pooled the different healthcare groups to produce a contingency table to conduct a  
238  $\chi^2$  test to report the difference in opinions between this group and the other groups. The  
239 threshold of significance was fixed at  $p < 0.05$ . This study was also carried out using  
240 Python 3.9.7 and the SciPy 1.7.1 module.

241 All participants provided informed permission before being permitted to view the survey.  
242 The survey was entirely optional, and participants were free to leave at any moment.  
243 The University of Bristol Ethics Committee authorised the project.

244 The questionnaire (See Supplementary document A) was created using current  
245 research, and assistance from professionals with endometriosis treatment expertise. It  
246 included 26 questions on basic endometriosis knowledge, diagnosis, treatment choices,  
247 and the effect of endometriosis on patients' mental health. Additionally, two validated  
248 questionnaires were also included. The first was the 'Flourishing Scale', an 8-item  
249 summary measure of self-perceived purpose, optimism, and self-esteem. The second  
250 was the 'Compassion Fatigue Scale', a 13-item scale measuring the psychological,  
251 physical, and emotional impact of working within a care role.

252 The poll was sent out through multiple methods, including social media, email, and  
253 professional networks, with a focus on mental healthcare workers in the United  
254 Kingdom. From May to July 2021, data was collected, and 727 replies were obtained.

255 The data was analysed using the above-mentioned statistical software programs to find  
256 any significant variations in knowledge and awareness of endometriosis across UK  
257 healthcare workers, with a special emphasis on mental healthcare employees.

258

## 259 **Results**

260

261 The sample included 144 healthcare professionals, however only 68 answered all the  
262 questions. Therefore, the rate of missing data for questions ranged from 35.4% to  
263 77.8%.

264

### 265 *Demographical analysis*

266 The demographic analysis of the survey results revealed that the majority of the  
267 participants (85.6%) were female, with the nursing profession having the largest  
268 representation (45.8%), followed by psychology/psychotherapy (18.3%), and medicine  
269 (11.6%). The majority of participants (52.7%) were from secondary care settings,  
270 followed by primary care (29.5%) and tertiary care (17.8%). The participants' average  
271 number of years of service was 12.5 years.

272

### 273 *Gender*

274 Of the 144 participants, 78 participants (54.2%) were females, 13 (9.0%) were males, 2  
275 (1.4%) preferred not to say and for 51 participants' (35.4%) gender information was  
276 missing (Figure 1 and Supplementary Table 1).

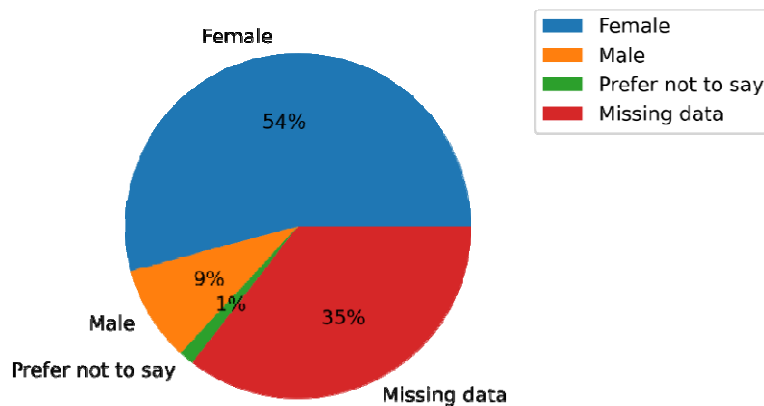

277  
278  
279

**Figure 1** Gender distribution of participants

280 *Profession*

281 The participants comprised psychiatrists or mental health staff 35 (24.3%), nurses 24  
282 (16.7%), researchers 3 (2.1%), a radiologist 1 (0.7%) an academic scientist 1 (0.7%)  
283 and other clinical groups 29 (20.1%) (Figure 2 and Supplementary Table 2). A total of  
284 51 participants' (35.4%) did not complete the professional information section.  
285

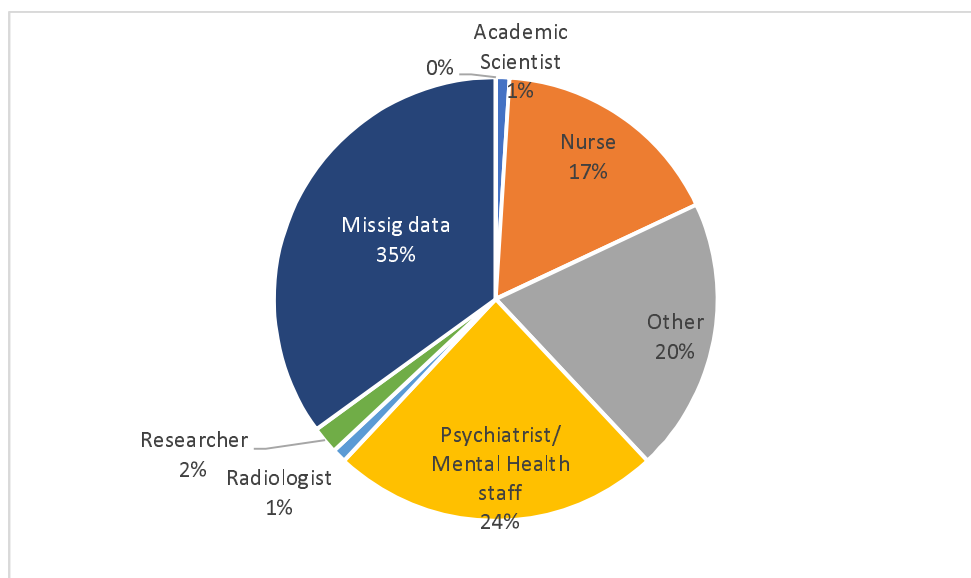

286  
287  
288  
289

**Figure 2** The profession distribution of participants

290 *Professional experience*

291 Participants had a mean of 102.9 months (SD: 118.8), in their chosen profession  
292 (Figure 3). A total of 39 participants' (27.1%) were working within primary care, 36  
293 (25.0%) at secondary level, 7 (4.9%) were at tertiary level and 11 (7.6%) were at other  
294 levels. Fifty one participants (35.4%) did not report this information (Figure 4 and  
295 Supplementary Table 3).

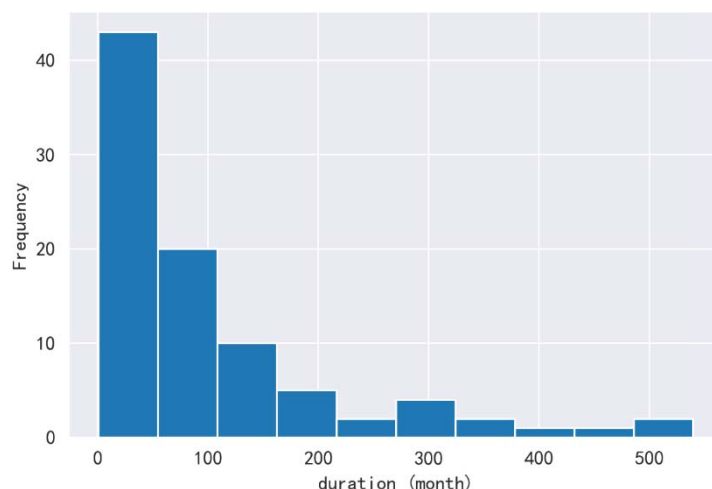

296  
297

**Figure 3** Participant's duration in chosen profession

298  
299  
300

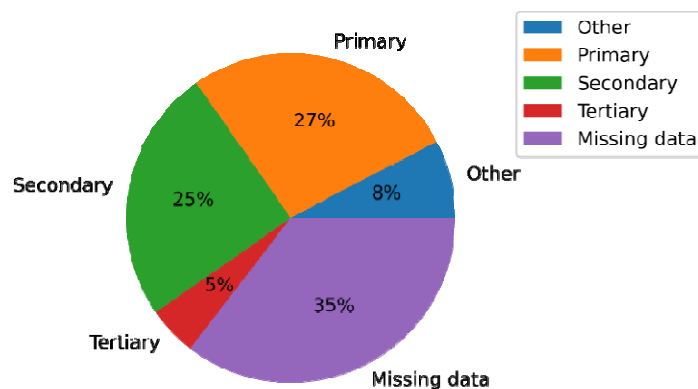

301  
302 **Figure 4** Healthcare setting of participants  
303

304 *Non-parametric statistical tests*

305 Three primary themes were reported by all the participants in relation to Endometriosis  
306 associated knowledge and practice.

307  
308 *Perceived Clinical Knowledge*

309 Approximately 63.1% of the participants confirmed that they knew about Endometriosis  
310 and were confident in their level of clinical knowledge (Supplementary Table 4 and  
311 Figure 5). The test showed that perceived clinical knowledge was not significantly  
312 linked to their profession (p-value=0.158).

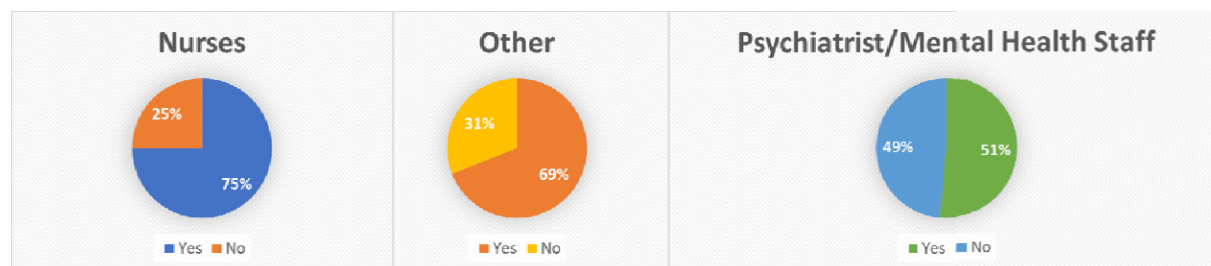

313  
314 **Figure 5.** Contingency chart indicating agreement with the questions: “Do you know what  
315 Endometriosis is? Are you comfortable with your level of clinical knowledge around it?”  
316

317 *Endometriosis Clinical Pathway*

318 A total of 96% of the participants agreed that they feel Endometriosis patients would  
319 benefit from a comprehensive clinical pathway that could be implemented across  
320 primary, secondary and tertiary care (Figure 6), whilst 4.0% did not agree with this view.  
321 The test of p-value of 1.0 in Supplementary Table 5 shows the opinions in different  
322 groups are consistent.

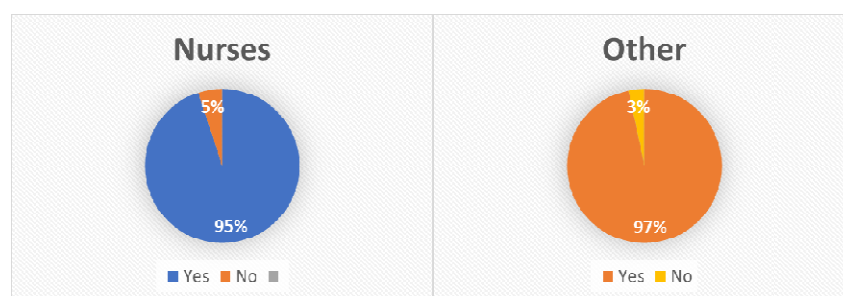

323  
324  
325  
326  
327  
328 **Figure 6.** Contingency graph indicating agreement with “Do you think patients with endometriosis  
329 would benefit from more comprehensive pathway that could be universally implemented across  
330 primary, secondary and tertiary care?”



331  
332  
333  
334  
335  
336  
337  
338  
339

### Mental Health Research

Approximately 92.3% of all participants agreed that it would be useful to conduct mental health-based research among women with endometriosis to better understand, navigate and develop clinical, and non-clinical interventions; whilst 7.7% did not agree with this statement (Figure 7 and Supplementary Table 6). The test showed a p-value of 0.556 and that the views may not necessarily be linked to their profession.

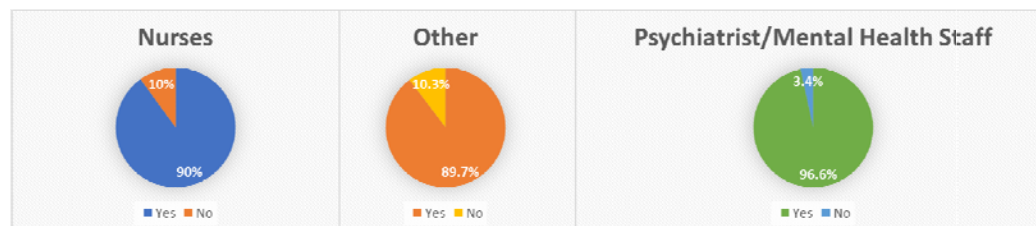

340  
341  
342  
343  
344

**Figure 7.** Contingency chart indicating agreement with “Do you think it would be useful to conduct mental health-based research for endometriosis women so that better clinical and/or non-clinical interventions can be developed?”

### Satisfaction

Participants reported varying levels of satisfaction with the support provided by local services to endometriosis patients. A total of 10.4% of participants were very dissatisfied, 12.5% dissatisfied, 54.2% remained neutral, 20.8% satisfied and 2.1% very satisfied. Although there were differing views among the different categories of professionals (Table 1) this did not reach statistical significance (p-value = 0.158).

351  
352  
353

**Table 1** Satisfaction based on the services provided to endometriosis patients by profession

| Profession                        | Very dissatisfied |              | Dissatisfied |              | Neutral /Not sure |              | Satisfied |              | Very satisfied |             | Total     |
|-----------------------------------|-------------------|--------------|--------------|--------------|-------------------|--------------|-----------|--------------|----------------|-------------|-----------|
|                                   | Count             | Percentage   | Count        | Percentage   | Count             | Percentage   | Count     | Percentage   | Count          | Percentage  |           |
| Nurse                             | 4                 | 20.0%        | 3            | 15.0%        | 9                 | 45.0%        | 4         | 20.0%        | 0              | 0.0%        | 20        |
| Psychiatrist /Mental health staff | 1                 | 3.6%         | 3            | 10.7%        | 17                | 60.7%        | 6         | 21.4%        | 1              | 3.6%        | 28        |
| <b>Total</b>                      | <b>5</b>          | <b>10.4%</b> | <b>6</b>     | <b>12.5%</b> | <b>26</b>         | <b>54.2%</b> | <b>10</b> | <b>20.8%</b> | <b>1</b>       | <b>2.1%</b> | <b>48</b> |

354  
355  
356  
357

Note: the p-value of test was 0.158, showing no significant difference of satisfaction between different professions; the number of missing answers was 95 leading to a missing rate of 66.0%.

### Participant mental health and wellbeing

There were two scale questionnaires (Flourishing Scale and Compassion Fatigue Scale) to measure participants' mental health which included their quality of life. The mean quality of life score for all participants was 45.26 (SD: 7.86) out of 56 (Figure 8) and the higher the score was the better life quality it indicated. To determine whether there was significant difference of the scale scores between different genders, professionals and setting, Wilcoxon-Mann-Whitney tests were performed. There was a significant difference in quality-of-life scores between different professions (p-value: 0.001, Figure 9). The means score among the nursing staff was 48.59, psychiatrist/mental health staff 47.11 and researchers 47; which was higher than that of the radiologist 32. There was no statistically significant difference based on gender (p=0.231) or the setting (p=0.429, Figure 9).

369

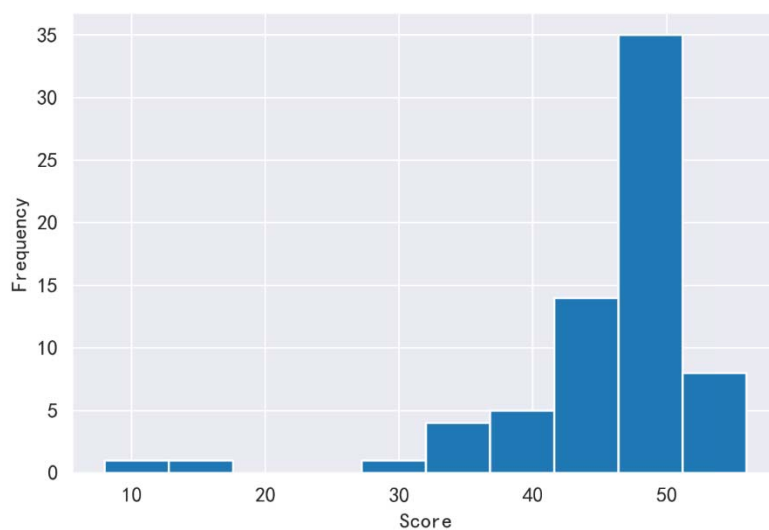

370  
371  
372

**Figure 8** Quality of life scores (there were 75 missing scores leading to a missing rate of 52.1%)

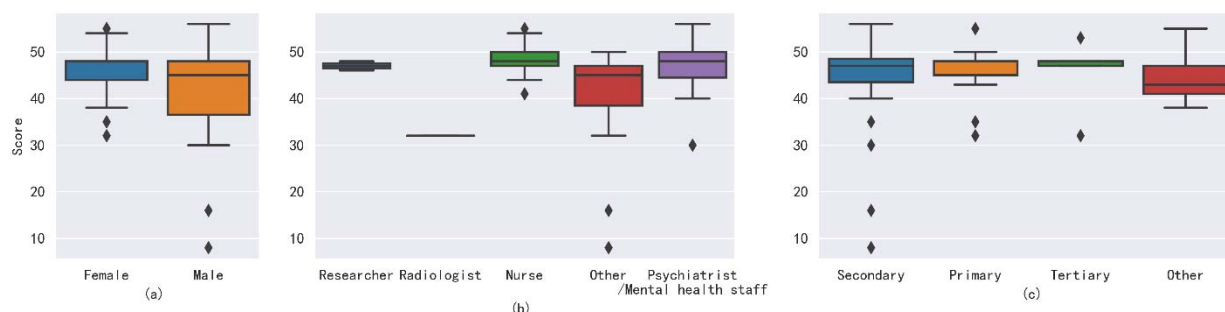

373  
374  
375  
376  
377  
378  
379  
380  
381  
382

**Figure 9** (a) Boxplot illustrating quality of life by gender (those responding “prefer not to say” for gender were not included in analysis). The p-value was 0.231, showing no significant difference between genders.

(b) Boxplot of quality-of-life scores by profession. The p-value was 0.001, showing significant difference between professions.

(c) Boxplot of quality-of-life scores by health setting. The p-value was 0.429, showing **no** significant difference between levels of local healthcare system.

383 A mean difficulty of life situation score of 47.38 (SD=19.47) out of 130 was recorded  
384 (Figure 10) and the higher the score was the more difficult a life situation it indicated. To  
385 determine whether there was significant difference of the scale scores between different  
386 genders, professions and settings, a Wilcoxon-Mann-Whitney test or a Kruskal-Wallis  
387 test was performed. A p-value of 0.022 was recorded when the scores from different  
388 professional groups were analysed, indicating a significant difference in scores between  
389 the groups. The mean score among psychiatrists/mental health staff was 50.18  
390 compared to researchers who had the lowest score at 37.5 (Figure 11). There were no  
391 significant differences between genders (p-value=0.315) or setting (p-value=0.081,  
392 Figure 11).

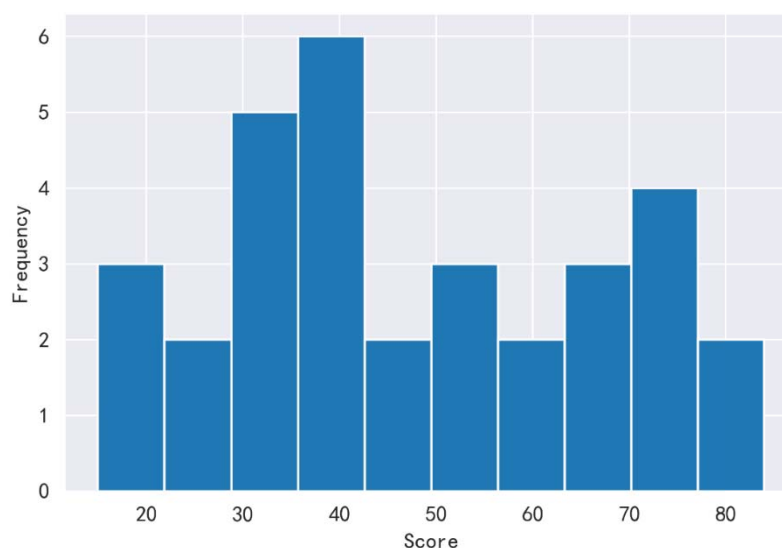

393  
394 **Figure 10** Histogram of scale scores of difficulty of life situation (there were 112 missing scores leading to  
395 a missing rate of 77.8%)  
396  
397

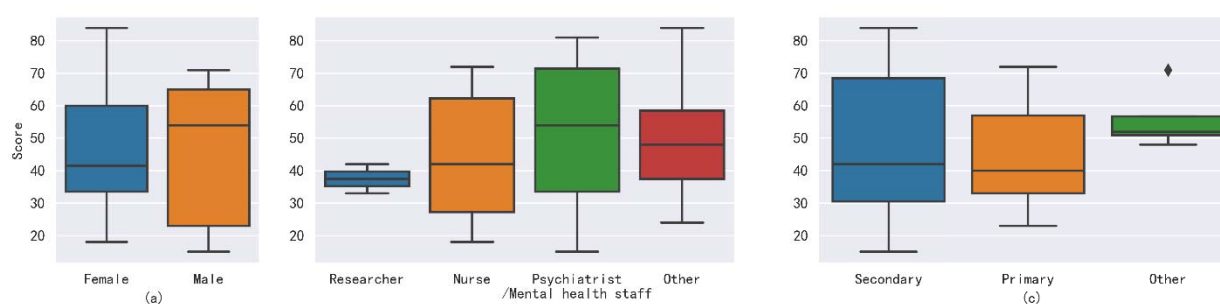

398  
399 **Figure 11** (a) Boxplot of difficulty of life situation by gender (those responding “prefer not to say” for  
400 gender were not included in analysis). The p-value was 0.315, showing **no** significant difference between  
401 genders.  
402 (b) Boxplot of difficulty of life situation by profession. The p-value was 0.022, showing significant  
403 difference between professions.  
404 (c) Boxplot of difficulty of life situation by setting. The p-value was 0.081, showing no significant difference  
405 between levels of local healthcare system.

406 The study found that there was a general lack of knowledge and awareness of  
407 endometriosis among UK healthcare professionals, especially those in mental health.  
408 The survey discovered that only 33.8% of individuals had a solid grasp of endometriosis.

- 409
- 410 • Fewer than half of the individuals correctly identified the most prevalent  
411 endometriosis symptoms, which included persistent pelvic pain (47.3%),  
412 dysmenorrhea (40.3%), and painful intercourse (36.3%).
  - 413 • Just 29.5% of those polled were aware that there is no cure for endometriosis,  
414 and fewer than half were aware of the different treatment choices.
  - 415 • As compared to primary care, healthcare personnel in intermediate and tertiary  
416 care settings had a greater knowledge of endometriosis.
  - 417 • There were substantial gender and profession variations in endometriosis  
418 comprehension and awareness, with female participants and those in nursing or  
419 psychology/psychotherapy having superior knowledge than male participants and  
420 those in other professions.
  - 421 • Respondents perceived that endometriosis had a limited influence on mental  
422 health, with just 28.8% of mental health providers noting the increased risk of  
despair and anxiety in women with endometriosis.

423 Overall, the research recommends that greater information and training for healthcare  
424 professionals, especially those in primary care and mental health, is needed to enhance  
425 the treatment and care of endometriosis patients in the United Kingdom.

426 **Discussion**

427

428 A key finding of this study is that majority of healthcare providers felt that Endometriosis  
429 patients would benefit from a streamlined clinical pathway. This could encompass timely  
430 recognition and diagnosis followed with medical treatment (e.g., surgery, medication).  
431 Psychological support could also be integrated with this to help with the emotional  
432 strain. Manifestations of physical and psychological symptoms can often be managed  
433 optimally if the relevant professional staffing groups are aware of the clinical  
434 background and ongoing care requirements of individual patients. Better management  
435 of patients could aid the NHS from a cost's perspective as the potential number of A&E  
436 visits by Endometriosis patients could be reduced. In addition, having a more  
437 streamlined clinical pathway could improve both communication and engagement levels  
438 between healthcare professionals and patients.

439

440 Endometriosis is recognised by caregivers as a complex disease to manage. More  
441 women than men participated in this study. It is important to improve gender  
442 representation in research but far more vital to understand if male healthcare  
443 professionals are aware of and understand endometriosis. The mental health impact of  
444 endometriosis among women indicates the need for better understanding and  
445 communication methods, as shown by the 'Endometriosis in the UK: time for change'  
446 reported published in 2020 by the All-Party Parliamentary Group. Patient advocacy  
447 groups have also indicated the need for better engagement and communication with  
448 endometriosis patients, especially in relation to their mental health and wellbeing given  
449 the potential exacerbation of the condition due to stress.

450

451 Patients with endometriosis engage with multidisciplinary teams at primary, secondary  
452 and tertiary care settings. The professional background is an important facet to consider  
453 exploring potential pathways and training requirements that could be designed in the  
454 future. Each of the settings have a variety of localised pathways and access to seek  
455 mental health services. The study findings revealed that there were considerable  
456 disparities in knowledge and awareness of endometriosis across UK healthcare  
457 professionals. Healthcare personnel in secondary and tertiary care settings, for example,  
458 have more knowledge and awareness of endometriosis than those in primary care.  
459 There were also substantial disparities in endometriosis comprehension and awareness  
460 depending on gender and career.

461

462 The most common route used in the UK is via GPs based in a primary care setting,  
463 although National Institute for Health and Care Excellence does not recommend the use  
464 of anti-depressants as a first line treatment for women with endometriosis reporting  
465 anxiety and/or depression at present. Given the current clinical pressures within primary  
466 healthcare services, often GPs refer patients to Improving Access to Psychological  
467 Therapies (IAPT) services for psychological interventions as recommended by the  
468 National Institute for Clinical Excellence (NICE) guidelines. Cognitive behavioural  
469 therapy (CBT) can often be a first step to support patients who may want to use a non-  
470 pharmacological route to secure therapeutic benefit. CBT could also be a sustainable  
471 tool that could be used by patients in a manner that is suited to their needs, empowering  
472 them to also have improved health seeking behaviours. This may not be a consideration  
473 either for the relevant mental healthcare professionals seeing the patients as it is not  
474 within their standard health questionnaire obtained at the first visit. Subsequent visits  
475 may not have such questionnaires which could prevent a diagnosis of endometriosis  
476 being recorded for those women who receive a late diagnosis, further complicating the  
477 ability to provide a more bespoke CBT approach. Furthermore, at present mental health  
478 care services currently lack endometriosis specific psychological protocols and the

479 complexities with any ongoing acute care may not be taken into consideration when  
480 generic approaches are administered to patients. Thereby, the therapeutic benefit may  
481 become suboptimal quite quickly.

482  
483 Another important consideration from this survey is that 92.3% of participants  
484 considered that mental health research conducted among endometriosis patients could  
485 aid the understanding, management and development of more suitable interventions  
486 that can be sustainably used. Often endometriosis patients are in significant pain and  
487 could be using analgesics that could negatively influence their overall medium to long-  
488 term wellbeing. Developing interventions that are of therapeutic benefit, minimally or  
489 non-invasive, and personalised to patient's requirements could also increase the overall  
490 healthcare outcomes in a positive manner among endometriosis patients. To achieve  
491 this, extensive clinical research would be required involving key stakeholders (e.g.,  
492 patients and healthcare providers). This is an important point for funders as there is  
493 currently a paucity of funding available for endometriosis and mental health research,  
494 yet this seems to be a huge clinical need.

495  
496 Endometriosis is largely a medical ailment, but it is also connected with a high incidence  
497 of anxiety, depression, and other mental health issues. This has the potential to  
498 significantly affect patients' quality of life and overall health outcomes. Healthcare  
499 practitioners must be aware of this and adopt a comprehensive approach to  
500 endometriosis treatment that considers both the physical and psychological elements of  
501 the ailment. Professional inexperience coupled with the awareness of endometriosis  
502 was another vital facet the study explored to better understand potential gaps.  
503 According to the findings of this survey, 63.9% of participants were unfamiliar with  
504 endometriosis, and only 22.8% thought they had adequate expertise to handle  
505 individuals with the illness. The research also emphasized the need of training and  
506 raising awareness among healthcare workers. To understand and accept the complex  
507 needs of endometriosis patients, a cultural transformation may be required as patients  
508 have reported concerns where they have felt to have not been heard. Endometriosis is  
509 still not commonly taught in medical colleges; therefore some doctors may be unaware  
510 of the illness. Participants noted a need for improved endometriosis education and  
511 training, as well as the need of having clear clinical standards for its care. This lack of  
512 knowledge may lead to delays in diagnosis and effective treatment, which can have a  
513 substantial impact on patients' physical and emotional health. This underlines the critical  
514 need for endometriosis education, include increased awareness around endometriosis  
515 symptoms, risk factors, diagnosis, and care, as well as impacts on mental health and  
516 well-being.

517  
518 Additionally, the research discovered that healthcare providers may not always consider  
519 the effect of endometriosis on fertility and reproductive health. Endometriosis is a  
520 prevalent cause of infertility, and people with the illness may need fertility therapy from a  
521 professional in order to conceive. Nevertheless, the survey indicated that only 32.8% of  
522 healthcare providers were competent in handling endometriosis's reproductive  
523 components, and 43.6% were not confident in addressing fertility difficulties with  
524 patients.

## 525 526 **Limitations**

527 One methodological limitation was that the sample size was of a medium scale. Future  
528 research would benefit from having a larger sample size to draw more comprehensive  
529 conclusions from some  $\chi^2$  tests. Due to this study taking place during the COVID-19  
530 pandemic, there were many challenges due to time constraints and availability of  
531 healthcare professionals in the UK.

## 532 533 **Conclusion**

534 This research emphasizes the need of healthcare workers recognizing endometriosis,  
535 its influence on patients' mental health and wellbeing, and its consequences for  
536 conception and reproductive health. It is vital that healthcare providers obtain the  
537 appropriate information and training in order to properly manage endometriosis patients  
538 and give the support and care they need to enhance their overall quality of life. There is  
539 a need for a more simplified clinical route for endometriosis patients, which might  
540 increase communication and engagement levels between healthcare personnel and  
541 patients. Comprehensive endometriosis education and training is required as well as the  
542 creation of endometriosis-specific psychological procedures. Healthcare services in the  
543 UK would benefit from conducting mental health research among endometriosis women  
544 to better understand the complex needs of the patients, alignment of these to develop  
545 patient centric healthcare services, improve access to mental healthcare services in  
546 areas where services currently exist and sustain these services to a growing population.  
547 Improved interim healthcare policies and clinical guidelines should be in place that are  
548 more patient centric to meet the demands of the endometriosis patients.  
549  
550

551 **References**

- 552 [1] Delanerolle G, Ramakrishnan R, Hapangama D, Zeng Y, Shetty A, Elneil S, Chong  
553 S, Hirsch M, Oyewole M, Phiri P, Elliot K, Kothari T, Rogers B, Sandle N, Haque N,  
554 Pluchino N, Silem M, O'Hara R, Hull ML, Majumder K, Shi JQ, Raymont V. A systematic  
555 review and meta-analysis of the Endometriosis and Mental-Health Sequelae; The  
556 ELEMI Project. *Women's Health (Lond)*. 2021 Jan-Dec; 17: 17455065211019717. doi:  
557 10.1177/17455065211019717. PMID: 34053382; PMCID: PMC8182632.  
558
- 559 [2] Surrey ES, Soliman AM, Johnson SJ, Davis M, Castelli-Haley J, Snabes MC. Risk of  
560 Developing Comorbidities Among Women with Endometriosis: A Retrospective Matched  
561 Cohort Study. *J Womens Health (Larchmt)*. 2018 Sep;27(9):1114-1123. doi:  
562 10.1089/jwh.2017.6432. Epub 2018 Aug 2. PMID: 30070938.  
563
- 564 [3] Griffith VA. The syndemic of endometriosis, stress, and stigma. *Stigma syndemics:  
565 new directions in biosocial health*. 2017 Sep 7:35-60  
566
- 567 [4] All Party Parliamentary Group on Endometriosis (2020). *Endometriosis in the UK:  
568 time for change*. Available at: [https://www.endometriosis-  
569 uk.org/sites/default/files/files/Endometriosis%20APPG%20Report%20Oct%202020.pdf](https://www.endometriosis-uk.org/sites/default/files/files/Endometriosis%20APPG%20Report%20Oct%202020.pdf)  
570
- 571 [5] Pugsley Z, Ballard K. Management of endometriosis in general practice: the pathway  
572 to diagnosis. *British Journal of General Practice*. 2007 Jun 1;57(539):470-6.  
573
- 574 [6] National Institute of Care and Health Excellence (2017). *Endometriosis: diagnosis  
575 and management*. Available from: [Overview | Endometriosis: diagnosis and  
576 management | Guidance | NICE](#)  
577
- 578 [7] Brown J, Crawford TJ, Allen C, Hopewell S, Prentice A. Nonsteroidal anti-  
579 inflammatory drugs for pain in women with endometriosis. *Cochrane Database Syst  
580 Rev*. 2017 Jan 23;1(1):CD004753. doi: 10.1002/14651858.CD004753.pub4. PMID:  
581 28114727; PMCID: PMC6464974.  
582
- 583 [8] Bedaiwy MA, Alfaraj S, Yong P, Casper R. New developments in the medical  
584 treatment of endometriosis. *Fertility and sterility*. 2017 Mar 1;107(3):555-65.  
585
